# Supplementary material for: Anemia and red blood cell transfusion practice in prolonged mechanically ventilated patients admitted to a specialized weaning center: an observational study
Source: Springer Nature journal article supplement (doi:10.1186/s12890-019-1009-1), 2019-12-01
Supplement: MOESM2 [file 17661282]

**Anemia and red blood cell transfusion practice in prolonged mechanically ventilated patients admitted to a specialized weaning center: an observational study.**

*Alessandro Ghiani, MD; Alexandros Sainis, MD; Georgios Sainis, MSc; and Claus Neurohr, MD.*

**Additional file 2**

- 1. Table S1 (Page 2)**
- 2. Table S2 (Page 3)**
- 3. Figure S1 (Page 3)**

**1. Table S1:** Comparison of number and percentage of different isolated pathogens according to the type of nosocomial infection

| Pathogen             | Group | VAP      | TB        | UTI       | Gastroenteritis | Decubitus infection | CR-BSI   | Other     |
|----------------------|-------|----------|-----------|-----------|-----------------|---------------------|----------|-----------|
| P. aeruginosa        | T     | 6 (30.0) | 12 (36.4) | 6 (16.7)  | -               | 2 (40.0)            | -        | 3 (12.5)  |
|                      | NT    | -        | 7 (28.0)  | 11 (31.4) | -               | -                   | -        | -         |
| E. faecium           | T     | -        | -         | 1 (2.8)   | -               | 2 (40.0)            | 2 (13.3) | 5 (20.8)  |
|                      | NT    | -        | -         | 4 (11.4)  | -               | -                   | -        | 1 (100.0) |
| E. faecalis          | T     | -        | -         | 2 (5.6)   | -               | -                   | 2 (13.3) | 2 (8.3)   |
|                      | NT    | -        | -         | 3 (8.6)   | -               | 1 (25.0)            | 2 (22.2) | -         |
| S. epidermidis       | T     | -        | -         | -         | -               | -                   | 8 (53.3) | 1 (4.2)   |
|                      | NT    | -        | -         | -         | -               | -                   | 1 (11.1) | -         |
| S. aureus            | T     | 4 (20.0) | 6 (18.2)  | 1 (2.8)   | -               | -                   | 1 (6.7)  | 2 (8.3)   |
|                      | NT    | 1 (50.0) | 6 (24.0)  | 1 (2.9)   | -               | -                   | 3 (33.3) | -         |
| E. coli              | T     | -        | 6 (18.2)  | 8 (22.2)  | -               | -                   | -        | 2 (8.3)   |
|                      | NT    | -        | 3 (12.0)  | 7 (20.0)  | -               | -                   | -        | -         |
| Enterobacter spp.    | T     | 1 (5.0)  | -         | 2 (5.6)   | -               | 1 (20.0)            | -        | 3 (12.5)  |
|                      | NT    | 1 (50.0) | 2 (8.0)   | 1 (2.9)   | -               | 1 (25.0)            | -        | -         |
| K. pneumoniae        | T     | 1 (5.0)  | 4 (12.1)  | 3 (8.3)   | -               | -                   | -        | 1 (4.2)   |
|                      | NT    | -        | 3 (12.0)  | 4 (11.4)  | -               | -                   | -        | -         |
| K. oxytoca           | T     | 1 (5.0)  | -         | 1 (2.8)   | -               | -                   | -        | -         |
|                      | NT    | -        | -         | 1 (2.9)   | -               | 1 (25.0)            | 1 (11.1) | -         |
| S. marcescens        | T     | 2 (10.0) | -         | 4 (11.1)  | -               | -                   | -        | -         |
|                      | NT    | -        | 1 (4.0)   | -         | -               | -                   | -        | -         |
| C. freundii          | T     | -        | -         | 1 (2.8)   | -               | -                   | -        | -         |
|                      | NT    | -        | -         | -         | -               | -                   | -        | -         |
| P. mirabilis         | T     | -        | -         | 1 (2.8)   | -               | -                   | -        | -         |
|                      | NT    | -        | 2 (8.0)   | 3 (8.6)   | -               | 1 (25.0)            | -        | -         |
| A. baumannii         | T     | 2 (10.0) | 1 (3.0)   | -         | -               | -                   | -        | -         |
|                      | NT    | -        | 1 (4.0)   | -         | -               | -                   | -        | -         |
| S. maltophilia       | T     | 2 (10.0) | 4 (12.1)  | -         | -               | -                   | -        | -         |
|                      | NT    | -        | -         | -         | -               | -                   | -        | -         |
| Candida spp.         | T     | -        | -         | 3 (8.3)   | -               | -                   | 1 (6.7)  | -         |
|                      | NT    | -        | -         | -         | -               | -                   | 1 (11.1) | -         |
| C. difficile         | T     | -        | -         | -         | 17 (85.0)       | -                   | -        | -         |
|                      | NT    | -        | -         | -         | 12 (100.0)      | -                   | -        | -         |
| Norovirus            | T     | -        | -         | -         | 3 (15.0)        | -                   | -        | -         |
|                      | NT    | -        | -         | -         | -               | -                   | -        | -         |
| Others               | T     | 1 (5.0)  | -         | 3 (8.3)   | -               | -                   | 1 (6.7)  | 5 (20.8)  |
|                      | NT    | -        | -         | -         | -               | -                   | 1 (11.1) | -         |
| No pathogen detected | T     | 8        | -         | 2         | -               | -                   | -        | 3         |
|                      | NT    | -        | 1         | 1         | -               | -                   | -        | -         |
| Summary              | T     | 20 (100) | 33 (100)  | 36 (100)  | 20 (100)        | 5 (100)             | 15 (100) | 24 (100)  |
|                      | NT    | 2 (100)  | 25 (100)  | 35 (100)  | 12 (100)        | 4 (100)             | 9 (100)  | 1 (100)   |

**Legend**

Results are presented as number or number (%).

*Abbreviations:* T, transfused group; NT, non transfused group; VAP, Ventilator-associated pneumonia; TB, Tracheobronchitis; UTI, Urinary tract infection; CR-BSI, Catheter-related blood stream infection; P. aeruginosa, Pseudomonas aeruginosa; E. faecium, Enterococcus faecium; E. faecalis, Enterococcus faecalis; S. epidermidis, Staphylococcus epidermidis; S. aureus, Staphylococcus aureus; E. coli, Escherichia coli; spp., species; K. pneumoniae, Klebsiella pneumoniae; K. oxytoca, Klebsiella oxytoca; S. marcescens, Serratia marcescens, C. freundii, Citrobacter freundii; P. mirabilis, Proteus mirabilis; A. baumannii, Acinetobacter baumannii; S. maltophilia, Stenotrophomonas maltophilia; C. difficile, Clostridium difficile; NI, Nosocomial infection.

**2. Table S2:** Comparison of number of different isolated MDR pathogens according to the type of nosocomial infection

| Pathogen          | Group | Drug Resistance | VAP      | TB       | UTI      | Decubitus infection | CR-BSI   | Other    | Summary   |
|-------------------|-------|-----------------|----------|----------|----------|---------------------|----------|----------|-----------|
| P. aeruginosa     | T     | 3MRGN           | 2        | 1        |          |                     |          |          | 3         |
|                   |       | 4MRGN           | 1        |          | 1        | 1                   |          | 1        | 4         |
|                   | NT    | 3MRGN           |          | 1        | 1        |                     |          |          | 2         |
|                   |       | 4MRGN           |          |          | 2        |                     |          |          | 2         |
| S. epidermidis    | T     | MRSE            |          |          |          |                     | 6        |          | 6         |
|                   | NT    | MRSE            |          |          |          |                     | 1        |          | 1         |
| S. aureus         | T     | MRSA            | 1        | 1        |          |                     |          |          | 2         |
|                   | NT    | MRSA            |          |          |          |                     | 1        |          | 1         |
| E. coli           | T     | 3MRGN           |          |          |          |                     |          | 1        | 1         |
|                   | NT    | ESBL            |          |          |          |                     |          |          |           |
| Enterobacter spp. | T     | Amp-C           |          | 1        | 2        | 1                   |          | 1        | 5         |
|                   | NT    | Amp-C           |          |          | 1        | 1                   |          |          | 2         |
| <b>Summary</b>    | T     |                 | <b>4</b> | <b>3</b> | <b>3</b> | <b>2</b>            | <b>6</b> | <b>3</b> | <b>21</b> |
|                   | NT    |                 | <b>0</b> | <b>1</b> | <b>5</b> | <b>1</b>            | <b>2</b> | <b>0</b> | <b>9</b>  |

**Legend**

Results are presented as number.

*Abbreviations:* T, transfused group; NT, non transfused group; MDR, Multidrug resistant; VAP, Ventilator-associated pneumonia; TB, Tracheobronchitis; UTI, Urinary tract infection; CR-BSI, Catheter-related blood stream infection; 3MRGN, multiresistant gram negative bacteria non-susceptible to three specific groups of antibiotics; 4MRGN, multiresistant gram negative bacteria non-susceptible to four specific groups of antibiotics; Amp-C, ampC β-lactamases producing antimicrobial resistant bacteria; MRSA, methicillin-resistant staphylococcus aureus; ESBL, extended spectrum β-lactamases producing antimicrobial resistant bacteria; MRSE, methicillin-resistant staphylococcus epidermidis.

**3. Figure S1:** Percentage of different pathogens in patients with nosocomial infections

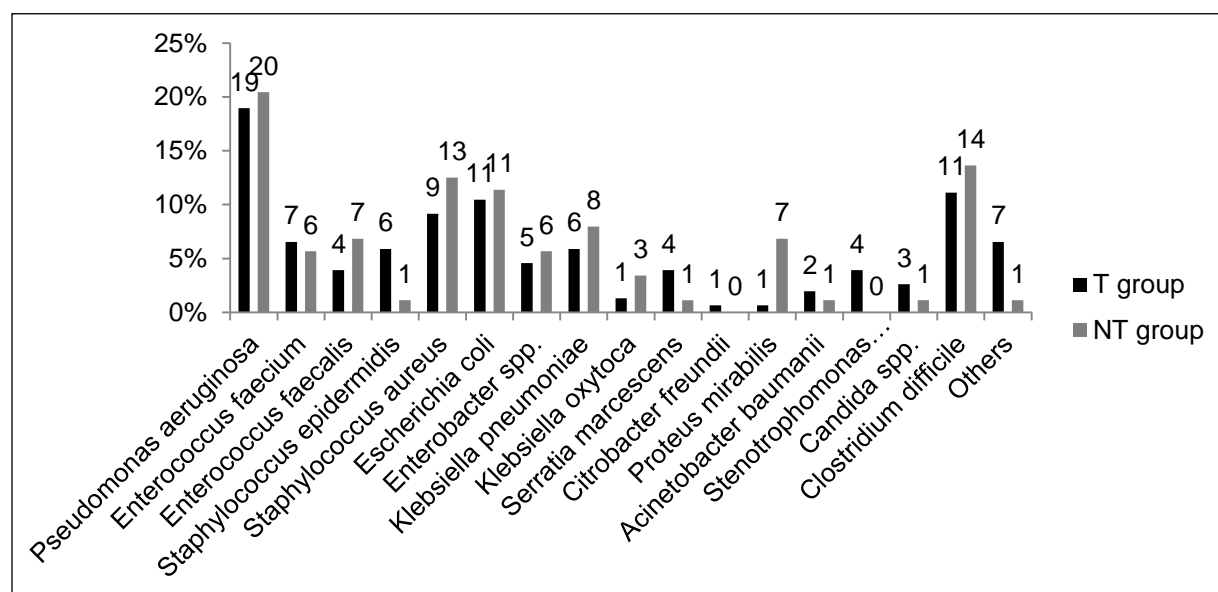

**Legend**

*Abbreviations:* spp., species; T group, transfused group; NT group, non-transfused group; Staphylococcus ..., Staphylococcus epidermidis; Stenotrophomonas ..., Stenotrophomonas maltophilia.
